# Supplementary material for: Updated recommendations: an assessment of NICE clinical guidelines
Source: PubMed Central journal article supplement (PMC4067507; doi:10.1186/1748-5908-9-72), 2014-06-11
Supplement: 1748-5908-9-72-S2.pdf [file 1748-5908-9-72-S2.pdf]

**Additional File 2: Sample selection**

| Id | Ref  | CGs                                                                                    | Date Issued | Review | Version                              | Selection | Exclusion reason |
|----|------|----------------------------------------------------------------------------------------|-------------|--------|--------------------------------------|-----------|------------------|
| 1  | C    | Electronic fetal monitoring (C) (replaced by CG55)                                     | may-01      |        | OriginalCG, replaced                 | Excluded  |                  |
| 2  | D    | Induction of labour (D) (replaced by CG70)                                             | jun-01      |        | OriginalCG, replaced                 | Excluded  |                  |
| 3  | A    | Myocardial infarction (A) (replaced by CG48) (withdrawn)                               | abr-01      |        | OriginalCG, replaced                 | Excluded  |                  |
| 4  | B    | Pressure ulcers (see Pressure ulcer management, CG29) (B)                              | abr-01      |        | OriginalCG, reviewed but not updated |           |                  |
| 5  | G    | Type 2 diabetes - blood glucose (G) (replaced by CG66)                                 | sep-02      |        | OriginalCG, replaced                 | Excluded  |                  |
| 6  | H    | Type 2 diabetes - management of blood pressure and blood lipids (H) (replaced by CG66) | oct-02      |        | OriginalCG, replaced                 | Excluded  |                  |
| 7  | F    | Type 2 diabetes - renal disease (F) (replaced by CG66)                                 | feb-02      |        | OriginalCG, replaced                 | Excluded  |                  |
| 8  | E    | Type 2 diabetes - retinopathy (E) (replaced by CG66)                                   | feb-02      |        | OriginalCG, replaced                 | Excluded  |                  |
| 9  | CG1  | Schizophrenia (CG1) (replaced by CG82)                                                 | dic-02      |        | OriginalCG, replaced                 | Excluded  |                  |
| 10 | CG2  | Infection control (CG2) (replaced by CG139)                                            | jun-03      |        | OriginalCG, replaced                 | Included  |                  |
| 11 | CG3  | Preoperative tests (CG3)                                                               | jun-03      |        | OriginalCG, not reviewed             |           |                  |
| 12 | CG4  | Head injury (CG4) (replaced by CG56) (withdrawn)                                       | jun-03      |        | OriginalCG, replaced                 | Included  |                  |
| 13 | CG5  | Chronic heart failure (CG5) (replaced by CG108)                                        | jul-03      |        | OriginalCG, replaced                 | Included  |                  |
| 14 | CG6  | Antenatal care (CG6) (replaced by CG62)                                                | oct-03      |        | OriginalCG, replaced                 | Excluded  |                  |
| 15 | CG7  | Pressure relieving devices (CG7)                                                       | oct-03      | may-11 | OriginalCG, reviewed but not updated |           |                  |
| 16 | CG8  | Multiple sclerosis (CG8)                                                               | nov-03      | jun-11 | OriginalCG, reviewed but not updated |           |                  |
| 17 | CG9  | Eating disorders (CG9)                                                                 | ene-04      |        | OriginalCG, not reviewed             |           |                  |
| 18 | CG10 | Type 2 diabetes - footcare (CG10)                                                      | ene-04      | ago-11 | OriginalCG, reviewed but not updated |           |                  |
| 19 | CG11 | Fertility (CG11) (replaced by CG156)                                                   | feb-04      |        | OriginalCG, replaced                 | Included  |                  |
| 20 | CG12 | Chronic obstructive pulmonary disease (CG12) (replaced by CG101)                       | feb-04      |        | OriginalCG, replaced                 | Included  |                  |
| 21 | CG13 | Caesarean section (replaced by CG132) (CG13)                                           | abr-04      |        | OriginalCG, replaced                 | Included  |                  |

**Additional File 2: Sample selection**

|    |      |                                                                               |        |        |                                      |          |                    |
|----|------|-------------------------------------------------------------------------------|--------|--------|--------------------------------------|----------|--------------------|
| 22 | CG14 | Familial breast cancer (CG14) (replaced by CG41) (withdrawn)                  | may-04 |        | OriginalCG, replaced                 | Excluded |                    |
| 23 | CG15 | Type 1 diabetes (CG15)                                                        | jul-04 | ago-11 | OriginalCG, reviewed but not updated |          |                    |
| 24 | CG16 | Self-harm (CG16)                                                              | jul-04 | feb-12 | OriginalCG, reviewed but not updated |          |                    |
| 25 | CG17 | Dyspepsia (CG17)                                                              | ago-04 | jul-11 | OriginalCG, reviewed but not updated |          |                    |
| 26 | CG18 | Hypertension (CG18) (replaced by CG34) (withdrawn)                            | ago-04 |        | OriginalCG, replaced                 | Excluded |                    |
| 27 | CG19 | Dental recall (CG19)                                                          | oct-04 | ago-12 | OriginalCG, reviewed but not updated |          |                    |
| 28 | CG20 | Epilepsy (CG20) (replaced by CG137)                                           | oct-04 |        | OriginalCG, replaced                 | Included |                    |
| 29 | CG21 | Falls (CG21)                                                                  | nov-04 | jul-11 | OriginalCG, reviewed but not updated |          |                    |
| 30 | CG22 | Anxiety (CG22) (replaced by CG113)                                            | dic-04 |        | OriginalCG, replaced                 | Excluded |                    |
| 31 | CG23 | Depression (CG23) (replaced by CG90)                                          | dic-04 |        | OriginalCG, replaced                 | Excluded |                    |
| 32 | CG24 | Lung cancer (CG24) (replaced by CG121)                                        | feb-05 |        | OriginalCG, replaced                 | Included |                    |
| 33 | CG25 | Violence (CG25)                                                               | feb-05 | feb-12 | OriginalCG, reviewed but not updated |          |                    |
| 34 | CG26 | Post-traumatic stress disorder (PTSD) (CG26)                                  | mar-05 |        | OriginalCG, not reviewed             |          |                    |
| 35 | CG27 | Referral for suspected cancer (CG27)                                          | jun-05 |        | OriginalCG, not reviewed             |          |                    |
| 36 | CG28 | Depression in children and young people (CG28)                                | sep-05 | feb-11 | OriginalCG, reviewed but not updated |          |                    |
| 37 | CG29 | Pressure ulcer management (CG29)                                              | sep-05 | may-11 | OriginalCG, reviewed but not updated |          |                    |
| 38 | CG30 | Long-acting reversible contraception (CG30)                                   | oct-05 | mar-11 | OriginalCG, reviewed but not updated |          |                    |
| 39 | CG31 | Obsessive compulsive disorder (OCD) and body dysmorphic disorder (BDD) (CG31) | nov-05 |        | OriginalCG, not reviewed             |          |                    |
| 40 | CG32 | Nutrition support in adults (CG32)                                            | feb-06 | jun-11 | OriginalCG, reviewed but not updated |          |                    |
| 41 | CG33 | Tuberculosis (CG33) (replaced by CG117)                                       | mar-06 |        | OriginalCG, replaced                 | Excluded |                    |
| 42 | CG34 | Hypertension (CG34) (replaced by CG127)                                       | jun-06 |        | UpdatedCG (first update)             | Excluded | Not update status  |
| 43 | CG35 | Parkinson's disease (CG35)                                                    | jun-06 | jul-11 | OriginalCG, reviewed but not updated |          |                    |
| 44 | CG36 | Atrial fibrillation (CG36)                                                    | jun-06 | ago-11 | OriginalCG, reviewed but not updated |          |                    |
| 45 | CG37 | Postnatal care (CG37)                                                         | jul-06 | feb-12 | OriginalCG, reviewed but not updated |          |                    |
| 46 | CG38 | Bipolar disorder (CG38)                                                       | jul-06 | jul-11 | OriginalCG, reviewed but not updated |          |                    |
| 47 | CG39 | Anaemia management in chronic kidney disease (CG39) (replaced by CG114)       | sep-06 |        | OriginalCG, replaced                 | Included |                    |
| 48 | CG40 | Urinary incontinence (CG40)                                                   | oct-06 |        | OriginalCG, not reviewed             |          |                    |
| 49 | CG41 | Familial breast cancer (CG41)                                                 | oct-06 |        | UpdatedCG (first update)             | Excluded | Not partial update |
| 50 | CG42 | Dementia (CG42)                                                               | nov-06 | abr-12 | OriginalCG, reviewed but not updated |          |                    |

**Additional File 2: Sample selection**

|    |      |                                                                            |        |        |                                      |          |                    |
|----|------|----------------------------------------------------------------------------|--------|--------|--------------------------------------|----------|--------------------|
| 51 | CG43 | Obesity (CG43)                                                             | dic-06 | dic-11 | OriginalCG, reviewed but not updated |          |                    |
| 52 | CG44 | Heavy menstrual bleeding (CG44)                                            | ene-07 | ene-12 | OriginalCG, reviewed but not updated |          |                    |
| 53 | CG45 | Antenatal and postnatal mental health (CG45)                               | feb-07 | jul-11 | OriginalCG, reviewed but not updated |          |                    |
| 54 | CG46 | Venous thromboembolism (surgical) (CG46)<br>(replaced by CG92) (withdrawn) | abr-07 |        | OriginalCG, replaced                 | Excluded |                    |
| 55 | CG47 | Feverish illness in children (CG47)                                        | may-07 | ene-11 | OriginalCG, reviewed but not updated |          |                    |
| 56 | CG48 | MI: secondary prevention (CG48)                                            | may-07 | feb-11 | UpdatedCG (first update)             | Excluded | Not partial update |
| 57 | CG49 | Faecal incontinence (CG49)                                                 | jun-07 | dic-10 | OriginalCG, reviewed but not updated |          |                    |
| 58 | CG50 | Acutely ill patients in hospital (CG50)                                    | jul-07 | dic-10 | OriginalCG, reviewed but not updated |          |                    |
| 59 | CG51 | Drug misuse: psychosocial interventions (CG51)                             | jul-07 | mar-11 | OriginalCG, reviewed but not updated |          |                    |
| 60 | CG52 | Drug misuse: opioid detoxification (CG52)                                  | jul-07 | mar-11 | OriginalCG, reviewed but not updated |          |                    |
| 61 | CG53 | Chronic fatigue syndrome / Myalgic<br>encephalomyelitis (CG53)             | ago-07 | mar-11 | OriginalCG, reviewed but not updated |          |                    |
| 62 | CG54 | Urinary tract infection in children (CG54)                                 | ago-07 | may-11 | OriginalCG, reviewed but not updated |          |                    |
| 63 | CG55 | Intrapartum care (CG55)                                                    | sep-07 |        | UpdatedCG (first update)             | Excluded | Not partial update |
| 64 | CG56 | Head injury (CG56)                                                         | sep-07 | mar-11 | UpdatedCG (first update)             | Included |                    |
| 65 | CG57 | Atopic eczema in children (CG57)                                           | dic-07 |        | OriginalCG, not reviewed             |          |                    |
| 66 | CG58 | Prostate cancer (CG58)                                                     | feb-08 | jul-11 | OriginalCG, reviewed but not updated |          |                    |
| 67 | CG59 | Osteoarthritis (CG59)                                                      | feb-08 | jun-11 | OriginalCG, reviewed but not updated |          |                    |
| 68 | CG60 | Surgical management of OME (CG60)                                          | feb-08 |        | OriginalCG, not reviewed             |          |                    |
| 69 | CG61 | Irritable bowel syndrome (CG61)                                            | feb-08 |        | OriginalCG, not reviewed             |          |                    |
| 70 | CG62 | Antenatal care (CG62)                                                      | mar-08 | may-11 | UpdatedCG (first update)             | Excluded | Not update status  |
| 71 | CG63 | Diabetes in pregnancy (CG63)                                               | mar-08 | may-11 | OriginalCG, reviewed but not updated |          |                    |
| 72 | CG64 | Prophylaxis against infective endocarditis (CG64)                          | mar-08 |        | OriginalCG, not reviewed             |          |                    |
| 73 | CG65 | Perioperative hypothermia (inadvertent) (CG65)                             | abr-08 | nov-11 | OriginalCG, reviewed but not updated |          |                    |
| 74 | CG66 | Type 2 diabetes (partially updated by CG87)<br>(CG66)                      | may-08 | ago-11 | UpdatedCG (first update)             | Excluded | Not partial update |
| 75 | CG67 | Lipid modification (CG67)                                                  | may-08 |        | OriginalCG, not reviewed             |          |                    |
| 76 | CG68 | Stroke (CG68)                                                              | jul-08 | abr-12 | OriginalCG, reviewed but not updated |          |                    |
| 77 | CG69 | Respiratory tract infections (CG69)                                        | jul-08 | jun-12 | OriginalCG, reviewed but not updated |          |                    |
| 78 | CG70 | Induction of labour (CG70)                                                 | jul-08 | ago-11 | UpdatedCG (first update)             | Excluded | Not partial update |
| 79 | CG71 | Familial hypercholesterolaemia (CG71)                                      | ago-08 | ago-11 | OriginalCG, reviewed but not updated |          |                    |

**Additional File 2: Sample selection**

|            |      |                                                                |        |        |                                      |          |                    |
|------------|------|----------------------------------------------------------------|--------|--------|--------------------------------------|----------|--------------------|
| <b>80</b>  | CG72 | Attention deficit hyperactivity disorder (ADHD) (CG72)         | sep-08 | nov-11 | OriginalCG, reviewed but not updated |          |                    |
| <b>81</b>  | CG73 | Chronic kidney disease (CG73)                                  | sep-08 | dic-11 | OriginalCG, reviewed but not updated |          |                    |
| <b>82</b>  | CG74 | Surgical site infection (CG74)                                 | oct-08 |        | OriginalCG, not reviewed             |          |                    |
| <b>83</b>  | CG75 | Metastatic spinal cord compression (CG75)                      | nov-08 | ago-12 | OriginalCG, reviewed but not updated |          |                    |
| <b>84</b>  | CG76 | Medicines adherence (CG76)                                     | ene-09 |        | OriginalCG, not reviewed             |          |                    |
| <b>85</b>  | CG77 | Antisocial personality disorder (CG77)                         | ene-09 | ene-12 | OriginalCG, reviewed but not updated |          |                    |
| <b>86</b>  | CG78 | Borderline personality disorder (BPD) (CG78)                   | ene-09 | ene-12 | OriginalCG, reviewed but not updated |          |                    |
| <b>87</b>  | CG79 | Rheumatoid arthritis (CG79)                                    | feb-09 | nov-11 | OriginalCG, reviewed but not updated |          |                    |
| <b>88</b>  | CG80 | Breast cancer (early & locally advanced) (CG80)                | feb-09 | mar-12 | OriginalCG, reviewed but not updated |          |                    |
| <b>89</b>  | CG81 | Breast cancer (advanced) (CG81)                                | feb-09 | mar-12 | OriginalCG, reviewed but not updated |          |                    |
| <b>90</b>  | CG82 | Schizophrenia (update) (CG82)                                  | mar-09 | ago-11 | UpdatedCG (first update)             | Excluded | Not partial update |
| <b>91</b>  | CG83 | Critical illness rehabilitation (CG83)                         | mar-09 | jun-12 | OriginalCG, reviewed but not updated |          |                    |
| <b>92</b>  | CG84 | Diarrhoea and vomiting in children under 5 (CG84)              | abr-09 | jul-12 | OriginalCG, reviewed but not updated |          |                    |
| <b>93</b>  | CG85 | Glaucoma (CG85)                                                | abr-09 | ago-12 | OriginalCG, reviewed but not updated |          |                    |
| <b>94</b>  | CG86 | Coeliac disease (CG86)                                         | may-09 | jul-12 | OriginalCG, reviewed but not updated |          |                    |
| <b>95</b>  | CG87 | Type 2 Diabetes - newer agents (partial update of CG66) (CG87) | may-09 | ago-11 | UpdatedCG (second update)            |          |                    |
| <b>96</b>  | CG88 | Low back pain (CG88)                                           | may-09 | jun-12 | OriginalCG, reviewed but not updated |          |                    |
| <b>97</b>  | CG89 | When to suspect child maltreatment (CG89)                      | jul-09 | ago-12 | OriginalCG, reviewed but not updated |          |                    |
| <b>98</b>  | CG90 | Depression in adults (update) (CG90)                           | oct-09 | oct-12 | UpdatedCG (first update)             | Excluded | Not partial update |
| <b>99</b>  | CG91 | Depression with a chronic physical health problem (CG91)       | oct-09 | oct-12 | OriginalCG, reviewed but not updated |          |                    |
| <b>100</b> | CG92 | Venous thromboembolism - reducing the risk (CG92)              | ene-10 | ene-13 | UpdatedCG (first update)             | Excluded | Not partial update |
| <b>101</b> | CG93 | Donor breast milk banks (CG93)                                 | feb-10 | feb-13 | OriginalCG, not reviewed             |          |                    |
| <b>102</b> | CG94 | Unstable angina and NSTEMI (CG94)                              | mar-10 | mar-13 | OriginalCG, not reviewed             |          |                    |
| <b>103</b> | CG95 | Chest pain of recent onset (CG95)                              | mar-10 | mar-13 | OriginalCG, not reviewed             |          |                    |
| <b>104</b> | CG96 | Neuropathic pain - pharmacological management (CG96)           | mar-10 |        | OriginalCG, not reviewed             |          |                    |
| <b>105</b> | CG97 | Lower urinary tract symptoms (CG97)                            | may-10 | may-13 | OriginalCG, not reviewed             |          |                    |
| <b>106</b> | CG98 | Neonatal jaundice (CG98)                                       | may-10 | may-13 | OriginalCG, not reviewed             |          |                    |

**Additional File 2: Sample selection**

|            |       |                                                                                        |        |        |                          |          |                   |
|------------|-------|----------------------------------------------------------------------------------------|--------|--------|--------------------------|----------|-------------------|
| <b>107</b> | CG99  | Constipation in children and young people (CG99)                                       | may-10 | may-13 | OriginalCG, not reviewed |          |                   |
| <b>108</b> | CG100 | Alcohol-use disorders: physical complications (CG100)                                  | jun-10 | jun-13 | OriginalCG, not reviewed |          |                   |
| <b>109</b> | CG101 | Chronic obstructive pulmonary disease (updated) (CG101)                                | jun-10 | jun-13 | UpdatedCG (first update) | Included |                   |
| <b>110</b> | CG102 | Bacterial meningitis and meningococcal septicaemia (CG102)                             | jun-10 | jun-13 | OriginalCG, not reviewed |          |                   |
| <b>111</b> | CG103 | Delirium (CG103)                                                                       | jul-10 | jul-13 | OriginalCG, not reviewed |          |                   |
| <b>112</b> | CG104 | Metastatic malignant disease of unknown primary origin (CG104)                         | jul-10 | jul-13 | OriginalCG, not reviewed |          |                   |
| <b>113</b> | CG105 | Motor neurone disease - non-invasive ventilation (CG105)                               | jul-10 | jul-13 | OriginalCG, not reviewed |          |                   |
| <b>114</b> | CG106 | Barrett's oesophagus - ablative therapy (CG106)                                        | ago-10 | ago-13 | OriginalCG, not reviewed |          |                   |
| <b>115</b> | CG107 | Hypertension in pregnancy (CG107)                                                      | ago-10 | ago-13 | OriginalCG, not reviewed |          |                   |
| <b>116</b> | CG108 | Chronic heart failure (CG108)                                                          | ago-10 | ago-13 | UpdatedCG (first update) | Included |                   |
| <b>117</b> | CG109 | Transient loss of consciousness in adults and young people (CG109)                     | ago-10 | ago-13 | OriginalCG, not reviewed |          |                   |
| <b>118</b> | CG110 | Pregnancy and complex social factors (CG110)                                           | sep-10 | sep-13 | OriginalCG, not reviewed |          |                   |
| <b>119</b> | CG111 | Nocturnal enuresis - the management of bedwetting in children and young people (CG111) | oct-10 | oct-13 | OriginalCG, not reviewed |          |                   |
| <b>120</b> | CG112 | Sedation in children and young people (CG112)                                          | dic-10 |        | OriginalCG, not reviewed |          |                   |
| <b>121</b> | CG113 | Anxiety (CG113)                                                                        | ene-11 |        | UpdatedCG (first update) | Excluded | Not update status |
| <b>122</b> | CG114 | Anaemia management in people with chronic kidney disease (CG114)                       | feb-11 | dic-11 | UpdatedCG (first update) | Included |                   |
| <b>123</b> | CG115 | Alcohol dependence and harmful alcohol use (CG115)                                     | feb-11 |        | OriginalCG, not reviewed |          |                   |
| <b>124</b> | CG116 | Food allergy in children and young people (CG116)                                      | feb-11 |        | OriginalCG, not reviewed |          |                   |
| <b>125</b> | CG117 | Tuberculosis (CG117)                                                                   | mar-11 |        | UpdatedCG (first update) | Excluded | Not update status |

**Additional File 2: Sample selection**

|     |       |                                                                                                                                      |        |     |                           |          |  |
|-----|-------|--------------------------------------------------------------------------------------------------------------------------------------|--------|-----|---------------------------|----------|--|
| 126 | CG118 | Colonoscopic surveillance for prevention of colorectal cancer in people with ulcerative colitis, Crohn's disease or adenomas (CG118) | mar-11 |     | OriginalCG, not reviewed  |          |  |
| 127 | CG119 | Diabetic foot problems - inpatient management (CG119)                                                                                | mar-11 |     | OriginalCG, not reviewed  |          |  |
| 128 | CG120 | Psychosis with coexisting substance misuse (CG120)                                                                                   | mar-11 |     | OriginalCG, not reviewed  |          |  |
| 129 | CG121 | Lung cancer (CG121)                                                                                                                  | abr-11 |     | UpdatedCG (first update)  | Included |  |
| 130 | CG122 | Ovarian cancer (CG122)                                                                                                               | abr-11 |     | OriginalCG, not reviewed  |          |  |
| 131 | CG123 | Common mental health disorders (CG123)                                                                                               | may-11 |     | OriginalCG, not reviewed  |          |  |
| 132 | CG124 | Hip fracture (CG124)                                                                                                                 | jun-11 | TBC | OriginalCG, not reviewed  |          |  |
| 133 | CG125 | Peritoneal dialysis (CG125)                                                                                                          | jul-11 |     | OriginalCG, not reviewed  |          |  |
| 134 | CG126 | Stable angina (CG126)                                                                                                                | jul-11 |     | OriginalCG, not reviewed  |          |  |
| 135 | CG127 | Hypertension (CG127)                                                                                                                 | ago-11 |     | UpdatedCG (second update) |          |  |
| 136 | CG128 | Autism in children and young people (CG128)                                                                                          | sep-11 |     | OriginalCG, not reviewed  |          |  |
| 137 | CG129 | Multiple pregnancy (CG129)                                                                                                           | sep-11 |     | OriginalCG, not reviewed  |          |  |
| 138 | CG130 | Hyperglycaemia in acute coronary syndromes (CG130)                                                                                   | oct-11 |     | OriginalCG, not reviewed  |          |  |
| 139 | CG131 | Colorectal cancer (CG131)                                                                                                            | nov-11 |     | OriginalCG, not reviewed  |          |  |
| 140 | CG132 | Caesarean section (CG132)                                                                                                            | nov-11 |     | UpdatedCG (first update)  | Included |  |
| 141 | CG133 | Self-harm (longer term management) (CG133)                                                                                           | nov-11 |     | OriginalCG, not reviewed  |          |  |
| 142 | CG134 | Anaphylaxis (CG134)                                                                                                                  | dic-11 |     | OriginalCG, not reviewed  |          |  |
| 143 | CG135 | Organ donation (CG135)                                                                                                               | dic-11 |     | OriginalCG, not reviewed  |          |  |
| 144 | CG136 | Service user experience in adult mental health (CG136)                                                                               | dic-11 |     | OriginalCG, not reviewed  |          |  |
| 145 | CG137 | Epilepsy (CG137)                                                                                                                     | ene-12 |     | UpdatedCG (first update)  | Included |  |
| 146 | CG138 | Patient experience in adult NHS services (CG138)                                                                                     | feb-12 |     | OriginalCG, not reviewed  |          |  |
| 147 | CG139 | Infection control (CG139)                                                                                                            | mar-12 |     | UpdatedCG (first update)  | Included |  |
| 148 | CG140 | Opioids in palliative care (CG140)                                                                                                   | may-12 |     | OriginalCG, not reviewed  |          |  |
| 149 | CG141 | Acute upper GI bleeding (CG141)                                                                                                      | jun-12 |     | OriginalCG, not reviewed  |          |  |
| 150 | CG142 | Autism in adults (CG142)                                                                                                             | jun-12 |     | OriginalCG, not reviewed  |          |  |
| 151 | CG143 | Sickle cell acute painful episode (CG143)                                                                                            | jun-12 |     | OriginalCG, not reviewed  |          |  |

## Additional File 2: Sample selection

|                                                                                                                                                                                                   |       |                                                                  |        |  |                          |          |
|---------------------------------------------------------------------------------------------------------------------------------------------------------------------------------------------------|-------|------------------------------------------------------------------|--------|--|--------------------------|----------|
| 152                                                                                                                                                                                               | CG144 | Venous thromboembolic diseases (CG144)                           | jun-12 |  | OriginalCG, not reviewed |          |
| 153                                                                                                                                                                                               | CG145 | Spasticity in children and young people (CG145)                  | jul-12 |  | OriginalCG, not reviewed |          |
| 154                                                                                                                                                                                               | CG146 | Osteoporosis fragility fracture (CG146)                          | ago-12 |  | OriginalCG, not reviewed |          |
| 155                                                                                                                                                                                               | CG147 | Lower limb peripheral arterial disease (CG147)                   | ago-12 |  | OriginalCG, not reviewed |          |
| 156                                                                                                                                                                                               | CG148 | Urinary incontinence in neurological disease (CG148)             | ago-12 |  | OriginalCG, not reviewed |          |
| 157                                                                                                                                                                                               | CG149 | Antibiotics for early-onset neonatal infection (CG149)           | ago-12 |  | OriginalCG, not reviewed |          |
| 158                                                                                                                                                                                               | CG150 | Headaches (CG150)                                                | sep-12 |  | OriginalCG, not reviewed |          |
| 159                                                                                                                                                                                               | CG151 | Neutropenic sepsis (CG151)                                       | sep-12 |  | OriginalCG, not reviewed |          |
| 160                                                                                                                                                                                               | CG152 | Crohn's disease (CG152)                                          | oct-12 |  | OriginalCG, not reviewed |          |
| 161                                                                                                                                                                                               | CG153 | Psoriasis (CG153)                                                | oct-12 |  | OriginalCG, not reviewed |          |
| 162                                                                                                                                                                                               | CG154 | Ectopic pregnancy and miscarriage (CG154)                        | dic-12 |  | OriginalCG, not reviewed |          |
| 163                                                                                                                                                                                               | CG155 | Psychosis and schizophrenia in children and young people (CG155) | ene-13 |  | OriginalCG, not reviewed |          |
| 164                                                                                                                                                                                               | CG156 | Fertility (CG156)                                                | feb-13 |  | UpdatedCG (first update) | Included |
| 165                                                                                                                                                                                               | CG157 | Hyperphosphataemia in chronic kidney disease (CG157)             | mar-13 |  | OriginalCG, not reviewed |          |
| 166                                                                                                                                                                                               | CG158 | Conduct disorders in children and young people (CG158)           | mar-13 |  | OriginalCG, not reviewed |          |
| <p><b>Source:</b> <a href="http://guidance.nice.org.uk/CG/Published">http://guidance.nice.org.uk/CG/Published</a> (this page was last updated: 09 May 2013)<br/> <b>Accessed :</b> 15/05/2013</p> |       |                                                                  |        |  |                          |          |
