# Supplementary material for: Updated recommendations: an assessment of NICE clinical guidelines
Source: PubMed Central journal article supplement (PMC4067507; doi:10.1186/1748-5908-9-72), 2014-06-11
Supplement: 1748-5908-9-72-S4.pdf [file 1748-5908-9-72-S4.pdf]

Additional File 4: Presentation formats

| Id | CGs                                                                    | Update status labels? | Highlight colour? | Bar down the side of the page? | Update status definition                                                                                                                                                                                                                                                                                                                                                                                                                                                                                                                                                                                                                                                                                                                                                                                                                     | Change recorded and/or explained                                                                                                                                                                                                                                                    |
|----|------------------------------------------------------------------------|-----------------------|-------------------|--------------------------------|----------------------------------------------------------------------------------------------------------------------------------------------------------------------------------------------------------------------------------------------------------------------------------------------------------------------------------------------------------------------------------------------------------------------------------------------------------------------------------------------------------------------------------------------------------------------------------------------------------------------------------------------------------------------------------------------------------------------------------------------------------------------------------------------------------------------------------------------|-------------------------------------------------------------------------------------------------------------------------------------------------------------------------------------------------------------------------------------------------------------------------------------|
| 1  | Anaemia management in people with chronic kidney disease (CG114), 2011 | Yes                   | Yes               | No                             | <p>Our assumption:</p> <ul style="list-style-type: none"> <li>• <b>without orange color</b> if the evidence has not been reviewed since the original guideline.</li> <li>• <b>partially highlighted in orange color or [2006, amended 2011]</b> if the evidence has not been reviewed, but an essential change has been made that affects the meaning of the recommendation.</li> <li>• <b>[2011]</b> if the evidence has been reviewed but no change has been made to the recommendation.</li> <li>• <b>[new 2011]</b> if the evidence has been reviewed and the recommendation has been updated or added.</li> </ul>                                                                                                                                                                                                                       | <ul style="list-style-type: none"> <li>• <b>Amended</b> recommendations partially highlighted in orange color and with footnotes</li> <li>• <b>Deleted</b> recommendations in "Appendix J: Deleted parts from the 2006 guideline (no longer relevant)" (pg. 544 full CG)</li> </ul> |
| 2  | Caesarean section (CG132), 2011                                        | Yes                   | No                | Yes                            | <p>Quote (pg. 2 full CG):</p> <p><i>"Recommendations are marked to indicate the year of the last evidence review:</i></p> <ul style="list-style-type: none"> <li>• <b>[2004]</b> if the evidence has not been reviewed since the original guideline.</li> <li>• <b>[2004, amended [2011]</b> if the evidence has not been reviewed, but an essential change has been made that affects the meaning of the recommendation.</li> <li>• <b>[2011]</b> if the evidence has been reviewed but no change has been made to the recommendation.</li> <li>• <b>[new 2011]</b> if the evidence has been reviewed and the recommendation has been updated or added." </li></ul>                                                                                                                                                                         | <ul style="list-style-type: none"> <li>• <b>Amended, new and deleted</b> recommendations in "Appendix J Changes to original recommendations"</li> </ul>                                                                                                                             |
| 3  | Chronic heart failure (CG108), 2010                                    | Yes                   | No                | No                             | <p>Quote (pg. 32 full CG):</p> <p><i>"The status of each recommendation is indicated as follows:</i></p> <ul style="list-style-type: none"> <li>• <b>[2003]</b>: Recommendation from the 2003 guideline where the evidence has not been formally reviewed for the 2010 update.</li> <li>• <b>[2003, amended 2010]</b>: A small amendment has been made to the 2003 recommendation but the evidence has not been updated or reviewed.</li> <li>• <b>[2010]</b>: Recommendation from the 2003 guideline where evidence has been reviewed but the recommendation is not changed. (This includes recommendations which are reworded in a new direct style.)</li> <li>• <b>[new 2010]</b>: Recommendation from 2003 guideline which has been changed following review of evidence; or New recommendation following review of evidence" </li></ul> | <ul style="list-style-type: none"> <li>• <b>Deleted</b> recommendations in "Appendix N – 2003 deleted recommendations"</li> </ul>                                                                                                                                                   |

Additional File 4: Presentation formats

|   |                                                               |     |     |     |                                                                                                                                                                                                                                                                                                                                                                                                                                                                                                                                                                                                                                                                                                                                                                                                                                                                                                                                                                                                                                                                                                                                                                                                                          |                                                                                                                                                                                                                                                      |
|---|---------------------------------------------------------------|-----|-----|-----|--------------------------------------------------------------------------------------------------------------------------------------------------------------------------------------------------------------------------------------------------------------------------------------------------------------------------------------------------------------------------------------------------------------------------------------------------------------------------------------------------------------------------------------------------------------------------------------------------------------------------------------------------------------------------------------------------------------------------------------------------------------------------------------------------------------------------------------------------------------------------------------------------------------------------------------------------------------------------------------------------------------------------------------------------------------------------------------------------------------------------------------------------------------------------------------------------------------------------|------------------------------------------------------------------------------------------------------------------------------------------------------------------------------------------------------------------------------------------------------|
| 4 | Chronic obstructive pulmonary disease (updated) (CG101), 2010 | Yes | Yes | No  | <p>Our assumption:</p> <ul style="list-style-type: none"> <li>• <b>without pink color</b> Recommendation from the 2004 guideline where the evidence has not been formally reviewed for the 2010 update.</li> <li>• <b>partially highlighted in pink color</b> A small amendment has been made to the 2004 recommendation but the evidence has not been updated or reviewed.</li> <li>• <b>[new 2010]</b> Recommendation from 2004 guideline which has been changed following review of evidence; or New recommendation following review of evidence</li> <li>• <b>[Deleted]</b></li> </ul>                                                                                                                                                                                                                                                                                                                                                                                                                                                                                                                                                                                                                               | <ul style="list-style-type: none"> <li>• <b>Amended</b> recommendations partially highlighted in pink color</li> <li>• <b>Deleted</b> recommendations in "Appendix K NEW 2010 deleted sections from original guideline" (pg. 531 full CG)</li> </ul> |
| 5 | Epilepsy (CG137), 2012                                        | Yes | Yes | No  | <p>Quote (pg. 28 full CG):<br/> <i>"Labelling of recommendations</i><br/> <ul style="list-style-type: none"> <li>• <i>New recommendations are defined as either an additional area for the guideline or changed because of an updated evidence review. New recommendations are labelled by adding <b>[NEW 2012]</b> to the end of the recommendation.</i></li> <li>• <i>Unchanged recommendations where the evidence has been reviewed for the 2012 update are labelled as <b>[2012]</b>. These recommendations could be reworded to match new-style recommendations but the developers checked with the GDG that rewording hasn't changed the meaning.</i></li> <li>• <i>Unchanged recommendations from 2004, where the evidence has not been formally reviewed for the 2011 update, are labelled as <b>[2004]</b>.</i></li> <li>• <i>Where evidence has not been reviewed, but there have been minor changes in 2012 to the wording of a 2004 recommendation that do not affect the meaning, for specific reasons such as in terminology or availability of drugs, these are labelled as <b>[2004, amended 2012]</b>. Deleted recommendations from the 2004 guideline can be viewed in Appendix X"</i></li> </ul> </p> | <ul style="list-style-type: none"> <li>• <b>Amended</b> recommendations with footnotes</li> <li>• <b>Deleted</b> recommendations in "APPENDIX V Removed sections from original guideline"</li> </ul>                                                 |
| 6 | Fertility (CG156), 2013                                       | Yes | No  | Yes | <p>Quote (pg. 4 full CG):<br/> <i>"Recommendations are marked to indicate the year and type of review:</i><br/> <ul style="list-style-type: none"> <li>• <i><b>[2004]</b> if the evidence has not been reviewed since the original guideline.</i></li> <li>• <i><b>[2004, amended 2013]</b> if the evidence has not been reviewed, but an essential change has been made that affects the meaning of the recommendation.</i></li> <li>• <i><b>[2013]</b> if the evidence has been reviewed but no change has been made to the recommendation.</i></li> <li>• <i><b>[new 2013]</b> if the evidence has been reviewed and the recommendation has been updated or added."</i></li> </ul> </p>                                                                                                                                                                                                                                                                                                                                                                                                                                                                                                                               | <ul style="list-style-type: none"> <li>• <b>Amended, new and deleted</b> recommendations in "Appendix L Proposed changes to original recommendations"</li> </ul>                                                                                     |

Additional File 4: Presentation formats

|   |                                 |     |     |     |                                                                                                                                                                                                                                                                                                                                                                                                                                                                                                                                                                                                                                                                                    |                                                                                                                           |
|---|---------------------------------|-----|-----|-----|------------------------------------------------------------------------------------------------------------------------------------------------------------------------------------------------------------------------------------------------------------------------------------------------------------------------------------------------------------------------------------------------------------------------------------------------------------------------------------------------------------------------------------------------------------------------------------------------------------------------------------------------------------------------------------|---------------------------------------------------------------------------------------------------------------------------|
| 7 | Head injury (CG56), 2007        | Yes | Yes | No  | <p>Quote (pg. 30 full CG):<br/> <i>"In this update, there are new recommendations in the sections on prehospital management, emergency department assessment, investigations for clinically important brain injuries, investigation for non-accidental injury in children, and transfer from secondary settings. These are highlighted in the document as 'New'. A number of amendments have been made to other recommendations from the initial guideline, and these are highlighted in the document as 'Amended'."</i></p>                                                                                                                                                       | -                                                                                                                         |
| 8 | Infection control (CG139), 2012 | Yes | Yes | No  | <p>Quote (pg. 4 full CG):<br/> <i>"Recommendations are marked to indicate the year of the last evidence review:</i></p> <ul style="list-style-type: none"> <li>• <i>[2003] if the evidence has not been updated since the original guideline,</i></li> <li>• <i>[2003, amended 2012] if the evidence has not been updated since the original guideline, but changes have been made that alter the meaning of the recommendation,</i></li> <li>• <i>[2012] if the evidence has been reviewed but no change has been made to the recommendation and</i></li> <li>• <i>[new 2012] if the evidence has been reviewed and the recommendation has been added or updated."</i></li> </ul> | <p>• <b>Amended, new and deleted</b> recommendations in "Appendix D: D.10 Deleted and amended recommendations (2003)"</p> |
| 9 | Lung cancer (CG121), 2011       | Yes | No  | Yes | <p>Quote (pg. 1 full CG):<br/> <i>"Recommendations are marked as [2005], [2011] or [new 2011]. [2005] indicates that the evidence has not been updated and reviewed since 2005. [2011] indicates that the evidence has been reviewed but no changes have been made to the recommendation. [new 2011] indicates that the evidence has been reviewed and the recommendation has been added or updated."</i></p>                                                                                                                                                                                                                                                                      | -                                                                                                                         |
