# Supplementary material for: Updated recommendations: an assessment of NICE clinical guidelines
Source: Springer Nature journal article supplement (doi:10.1186/1748-5908-9-72), 2014-06-11
Supplement: 13012_2013_777_MOESM1_ESM.pdf [file 13012_2013_777_MOESM1_ESM.pdf]

**Additional File 1: Information about recoding (purpose)**

| Access to services - Referral and approach to care - Service organisation [Access] | Diagnostic    | Monitoring - Follow up [Monitoring] | Prevention practices [Prevention] | Supporting patients and carers [Supporting] | Treatment      | >1 procedure - Others [Others] |
|------------------------------------------------------------------------------------|---------------|-------------------------------------|-----------------------------------|---------------------------------------------|----------------|--------------------------------|
| access to                                                                          | analysis      | follow                              | alcohol                           | advice                                      | resp           |                                |
| admission                                                                          | assess        | measured                            | catheter                          | agree                                       | administration |                                |
| admission                                                                          | CT            | monitor                             | clean                             | aware                                       | dosing         |                                |
| available                                                                          | define        | observations                        | container                         | card                                        | drug           |                                |
| care                                                                               | diagnos       | reappraisal                         | contaminat                        | carer                                       | effecti        |                                |
| centre                                                                             | EEG           | review                              | drainage                          | communication                               | indicat        |                                |
| clinician                                                                          | examination   | others                              | dressing                          | counselling                                 | intervention   |                                |
| consultant                                                                         | exclude       |                                     | exercise                          | discuss                                     | manag          |                                |
| discharg                                                                           | identif       |                                     | full-body fluid-repellen          | educat                                      | medication     |                                |
| document                                                                           | imaging       |                                     | gloves                            | empower                                     | pharma         |                                |
| environment                                                                        | investigation |                                     | hygiene                           | encourag                                    | prescribe      |                                |
| guideline                                                                          | measure       |                                     | infect                            | enquiry                                     | prescription   |                                |
| hospital                                                                           | MRI           |                                     | lifestyle                         | famil                                       | programmes     |                                |
| multidisciplinary                                                                  | radiograph    |                                     | needle                            | inform                                      | surg           |                                |
| network                                                                            | scan          |                                     | no-touch technique                | instruction                                 | surgery        |                                |
| nurse                                                                              | spirometry    |                                     | plastic aprons                    | participate                                 | therap         |                                |
| protocol                                                                           | stud          |                                     | prevent                           | preference                                  | treat          |                                |
| refer                                                                              | suspect       |                                     | prophyla                          | relative                                    | others         |                                |
| service                                                                            | test          |                                     | protect                           | self                                        |                |                                |
| setting                                                                            | X-ray         |                                     | ready-to-use feeds                | share                                       |                |                                |
| specialist                                                                         | others        |                                     | risk                              | support                                     |                |                                |
| staff                                                                              |               |                                     | screening                         | others                                      |                |                                |
| team                                                                               |               |                                     | septic                            |                                             |                |                                |
| transfer                                                                           |               |                                     | sharp                             |                                             |                |                                |
| unit                                                                               |               |                                     | single (use)                      |                                             |                |                                |
| others                                                                             |               |                                     | smoke                             |                                             |                |                                |
|                                                                                    |               |                                     | sterile                           |                                             |                |                                |
|                                                                                    |               |                                     | vaccin                            |                                             |                |                                |

**Additional File 1: Information about recoding (purpose)**

|  |  |  |        |  |  |  |
|--|--|--|--------|--|--|--|
|  |  |  | wash   |  |  |  |
|  |  |  | others |  |  |  |



**Additional File 1: Information about recoding (GRADE)**

| Legal           | Strong              | Weak                    |
|-----------------|---------------------|-------------------------|
| Must            | Should              | Consider                |
| Must and Should | Ensure              | <i>[Without others]</i> |
|                 | Should and Consider |                         |

**Additional File 1: Information about recoding (update status)**

| Amended                               | New            | Not changed  | Not reviewed           |
|---------------------------------------|----------------|--------------|------------------------|
| [2003, amended 2010]                  | [2007]         | [2010]       | -                      |
| [2003, amended 2010] KPI              | [new 2010]     | [2011]       | [2003]                 |
| [2003, amended 2012]                  | [new 2010] KPI | [2012]       | [2003] KPI             |
| [2004, amended 2011]                  | [new 2011]     | [2013]       | [2004]                 |
| [2004, amended 2012]                  | [new 2012]     | Not changing | [2005]                 |
| [2004, amended 2013]                  | [new 2013]     |              | [without orange color] |
| [2006, amended 2011]                  | [NEW]          |              | [without pink color]   |
| [Amended]                             | New            |              |                        |
| [partially highlighted in orange]     | NEW 2010       |              |                        |
| [partially highlighted in pink color] |                |              |                        |
