# Supplementary material for: Updated recommendations: an assessment of NICE clinical guidelines
Source: Springer Nature journal article supplement (doi:10.1186/1748-5908-9-72), 2014-06-11
Supplement: 13012_2013_777_MOESM3_ESM.pdf [file 13012_2013_777_MOESM3_ESM.pdf]

### Additional File 3: Documented changes in recommendations

|                                                               | Amended recommendations<br>(n=35) |      | Deleted<br>recommendations (n=13) |      | New-replaced<br>recommendations (n=33) |      |
|---------------------------------------------------------------|-----------------------------------|------|-----------------------------------|------|----------------------------------------|------|
|                                                               | n                                 | %    | n                                 | %    | n                                      | %    |
| <b>Documented changes*</b>                                    |                                   |      |                                   |      |                                        |      |
| . Conflicted with others recommendations                      | -                                 | -    | 2                                 | 15,4 | -                                      | -    |
| . Drug licence                                                | 2                                 | 5,7  | -                                 | -    | -                                      | -    |
| . New evidence                                                | 1                                 | 2,9  | 2                                 | 15,4 | 21                                     | 63,6 |
| . New scope                                                   | 3                                 | 8,6  | -                                 | -    | -                                      | -    |
| . Recommendation not applicable                               | -                                 | -    | 3                                 | 23,1 | -                                      | -    |
| . Outside the scope                                           | -                                 | -    | 4                                 | 30,8 | -                                      | -    |
| . Population                                                  | 1                                 | 2,9  | -                                 | -    | 2                                      | 6,1  |
| . Reference guideline updated                                 | 4                                 | 11,4 | -                                 | -    | -                                      | -    |
| . Writing style (accuracy, clarity, consistency, terminology) | 23                                | 65,7 | -                                 | -    | 11                                     | 33,3 |
| . Others                                                      | 2                                 | 5,7  | 2                                 | 15,4 | 2                                      | 6,1  |
|                                                               |                                   |      |                                   |      |                                        |      |
| *More than one possible category                              |                                   |      |                                   |      |                                        |      |
