# Supplementary material for: Updated recommendations: an assessment of NICE clinical guidelines
Source: Springer Nature journal article supplement (doi:10.1186/1748-5908-9-72), 2014-06-11
Supplement: 13012_2013_777_MOESM5_ESM.pdf [file 13012_2013_777_MOESM5_ESM.pdf]

## Additional file 3: Presentation format example - recommendations update status labels plus highlight colour

### Caesarean section (CG132)

#### 4.2.4.4 General principles for management of vascular access devices

88. Decontaminate the injection port or vascular access device catheter hub before and after accessing the system using chlorhexidine gluconate in 70% alcohol. Consider using an aqueous solution of chlorhexidine gluconate if the manufacturer's recommendations prohibit the use of alcohol with their catheter. [new 2012]

Update 2012

89. In-line filters should not be used routinely for infection prevention. [2003]

90. Antibiotic lock solutions should not be used routinely to prevent catheter-related bloodstream infections (CRBSI). [2003]

91. Systemic antimicrobial prophylaxis should not be used routinely to prevent catheter colonisation or CRBSI, either before insertion or during the use of a central venous catheter. [2003]

92. Preferably, a single lumen catheter should be used to administer parenteral nutrition. If a multilumen catheter is used, one port must be exclusively dedicated for total parenteral nutrition, and all lumens must be handled with the same meticulous attention to aseptic technique. [2003]

Reference: National Institute for Clinical Excellence. CG132 - Caesarean section (update). <http://guidance.nice.org.uk/CG132> (accessed 15 May, 2013).

## Additional file 3: Presentation format example - recommendations update status labels plus bar down the side of the page

### Infection control (CG139)

- |   | <b>Provision of information</b>                                                                                                                                                                                                                                                                                                                                                                                                                                                                        |     |
|---|--------------------------------------------------------------------------------------------------------------------------------------------------------------------------------------------------------------------------------------------------------------------------------------------------------------------------------------------------------------------------------------------------------------------------------------------------------------------------------------------------------|-----|
| 1 | Pregnant women should be offered evidence-based information and support to enable them to make informed decisions about childbirth. Addressing women's views and concerns should be recognised as being integral to the decision-making process. [C] [2004]                                                                                                                                                                                                                                            | 4.1 |
| 2 | Give pregnant women evidence-based information about CS during the antenatal period, because about 1 in 4 women will have a CS. Include information about CS, such as: <ul style="list-style-type: none"><li>• indications for CS (such as presumed fetal compromise, 'failure to progress' in labour, breech presentation)</li><li>• what the procedure involves</li><li>• associated risks and benefits</li><li>• implications for future pregnancies and birth after CS. [GPP] [new 2011]</li></ul> | 4.1 |

2011 update

Reference: National Institute for Clinical Excellence. CG139 - Infection: prevention and control of healthcare-associated infections in primary and community care. <http://guidance.nice.org.uk/CG139> (accessed 15 May, 2013).

## Additional file 3: Presentation format example - head to head comparison between original and updated recommendations

### Fertility (CG156)

| Recommendation                                                                                                                          | Replaced with                                                                                                                                                                                                                                                                                                                                                        | Reason for change/deletion                                                                        |
|-----------------------------------------------------------------------------------------------------------------------------------------|----------------------------------------------------------------------------------------------------------------------------------------------------------------------------------------------------------------------------------------------------------------------------------------------------------------------------------------------------------------------|---------------------------------------------------------------------------------------------------|
| Women should be informed that the value of assessing ovarian reserve using inhibin B is uncertain and is therefore not recommended. [C] | <p>response and less than 4 IU/l for a high response<sup>6</sup>. <b>[new 2013]</b></p> <p>Do not use any of the following tests individually to predict any outcome of fertility treatment:</p> <ul style="list-style-type: none"> <li>• ovarian volume</li> <li>• ovarian blood flow</li> <li>• inhibin B</li> <li>• oestradiol (E2). <b>[new 2013]</b></li> </ul> | New evidence on ovarian reserve was reviewed and the recommendation has been updated accordingly. |

Reference: National Institute for Clinical Excellence. CG156 - Fertility: assessment and treatment for people with fertility problems. <http://guidance.nice.org.uk/CG156> (accessed 15 May, 2013).
