# Supplementary material for: Updated recommendations: an assessment of NICE clinical guidelines
Source: Springer Nature journal article supplement (doi:10.1186/1748-5908-9-72), 2014-06-11
Supplement: 13012_2013_777_MOESM6_ESM.pdf [file 13012_2013_777_MOESM6_ESM.pdf]

**Additional file 6: Reporting information score**

| Id | CGs                                                                    | Recommendation update status defined? | Amended - Changes recorded? | Amended - Changes explanation? | Deleted - Changes recorded? | Deleted - Changes explanation? | New (replaced) - Changes recorded? | New (replaced) - Changes explanation? | Points | Max possible points | 10 Score |
|----|------------------------------------------------------------------------|---------------------------------------|-----------------------------|--------------------------------|-----------------------------|--------------------------------|------------------------------------|---------------------------------------|--------|---------------------|----------|
| 1  | Anaemia management in people with chronic kidney disease (CG114), 2011 | 0                                     | 1                           | 1                              | 1                           | 0                              | 0                                  | 0                                     | 3      | 7                   | 4,3      |
| 2  | Caesarean section (CG132), 2011                                        | 1                                     | 1                           | 1                              | 1                           | 1                              | 1                                  | 1                                     | 7      | 7                   | 10,0     |
| 3  | Chronic heart failure (CG108), 2010                                    | 1                                     | 0                           | 0                              | 1                           | 0                              | 0                                  | 0                                     | 2      | 7                   | 2,9      |
| 4  | Chronic obstructive pulmonary disease (updated) (CG101), 2010          | 0                                     | 1                           | 0                              | 1                           | 0                              | -                                  | -                                     | 2      | 5                   | 4,0      |
| 5  | Epilepsy (CG137), 2012                                                 | 1                                     | 1                           | 1                              | 1                           | 1                              | 0                                  | 0                                     | 5      | 7                   | 7,1      |
| 6  | Fertility (CG156), 2013                                                | 1                                     | 1                           | 1                              | 1                           | 1                              | 1                                  | 1                                     | 7      | 7                   | 10,0     |
| 7  | Head injury (CG56), 2007                                               | 1                                     | 0                           | 0                              | 0                           | 0                              | 0                                  | 0                                     | 1      | 7                   | 1,4      |
| 8  | Infection control (CG139), 2012                                        | 1                                     | 1                           | 1                              | 1                           | 0                              | 1                                  | 0                                     | 5      | 7                   | 7,1      |
| 9  | Lung cancer (CG121), 2011                                              | 1                                     | -                           | -                              | 0                           | 0                              | -                                  | -                                     | 1      | 3                   | 3,3      |
